# Supplementary material for: Identification and molecular structure analysis of a new noncoding RNA, a sbRNA homolog, in the silkworm Bombyx mori genome
Source: Royal Society of Chemistry journal article supplement (doi:10.1039/c4mb00595c), 2014-12-11
Supplement: c4mb00595c5.pdf [file c4mb00595c5.pdf]

## Identification and molecular structure analysis of a new noncoding RNA, a sbRNA homologous, in the silkworm *Bombyx mori* genome

Francisco Ferreira Duarte Junior<sup>1</sup>, Quirino Alves de Lima Neto<sup>1</sup>, Fabiana dos Santos Rando<sup>1</sup>, Douglas Vinícius Bassalobre de Freitas<sup>1</sup>, José Renato Pattaro Júnior<sup>1</sup>, Lorena Gomes Polizelli<sup>1</sup>, Roxelle Ethienne Ferreira Munhoz<sup>1</sup>, Flavio Augusto Vicente Seixas<sup>2</sup> and Maria Aparecida Fernandez<sup>1\*</sup>.

<sup>1</sup>Departamento de Biotecnologia, Genética e Biologia Celular, <sup>2</sup>Departamento de Bioquímica, Universidade Estadual de Maringá, Av. Colombo 5.790, 87020-900, Maringá, Paraná, Brasil

### SUPPLEMENTARY DATA

```
> gi|185050365|dbj|AP009009.1| Bombyx mori genomic DNA,
chromosome 4, partial sequence
GAAACGATCTCACGGTTTTATGTGATGATTTTCTATTAATATCGTCTTTGTCACAATATA
ACTCATTATTTTCTAGAGGTAACATTCTGTCAGTACAGTTACTACTGT TATAAAA CCGTT
TTAATTTCTTCAATACA GCTTGAACGTCTCGTGGCTTATCCATATCGATGTCTTCAAAG
ATTCTTCTAGTTTT ATATTTCTTTATAGAAATAATCGTGAGGTACAGGAAACCTTTAA
CTATAAAATCAGCAGCTCCGCCGTAGTTAGGTGTGGTTATTGTCTGTCGGTATGCACATT
CGAAATTGCCGGTCGAAGCATTTTTGTCAGCAGCATAATCTATCACAAC
```

**Fig 1S.** The *Bombyx mori* sbRNA gene and regulatory sequences. The promoter region, presenting a TATA-box, is shown in light blue, the *Bmsb*RNA gene sequence in yellow, and the termination signal, made up of T residues, in green. The promoter and stopping motifs for RNA pol III was according to described elsewhere.<sup>31</sup>

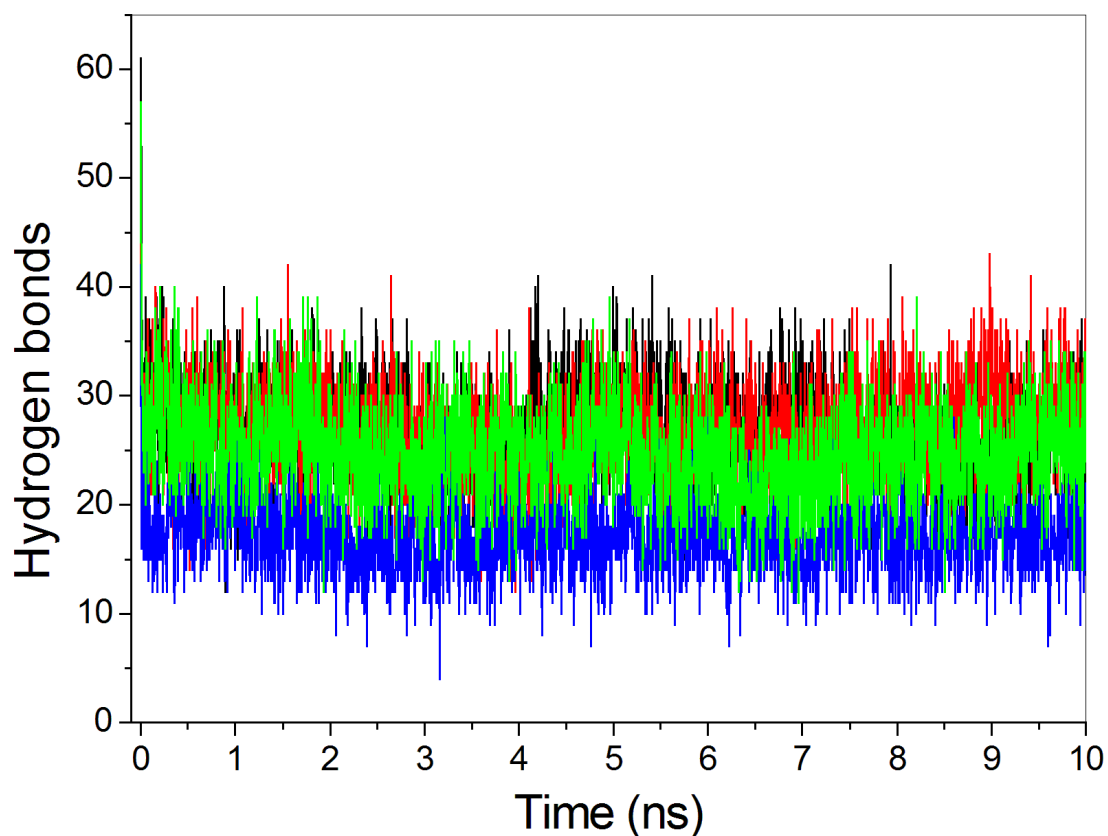

**Fig 2S.** Number of hydrogen bonds along 10ns simulation. The colours indicate the RNA segments for human Y5 RNA, Chinese hamster Y5 RNA, *B. mori* sbRNA and *C. elegans* sbRNA in black, red, blue and green, respectively. The continuing trend of the number of hydrogen bonds along simulation also indicates the stability of the segments.

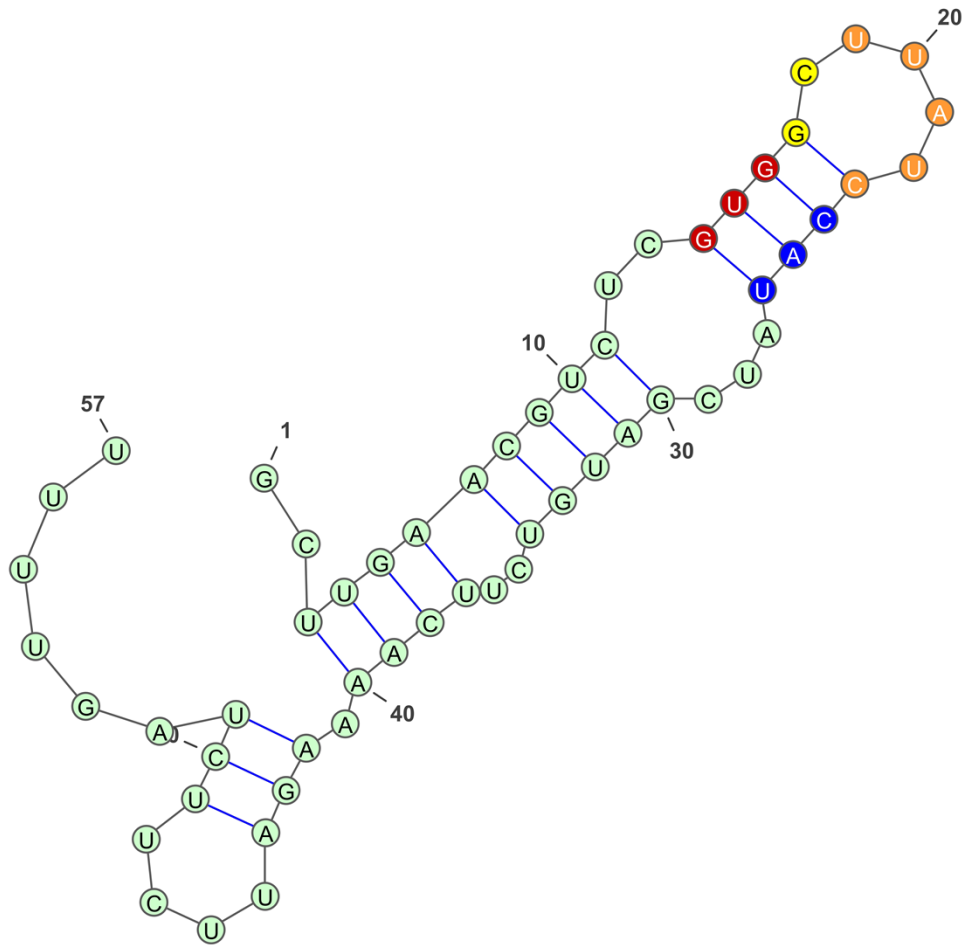

**Fig 3S.** Alternative model of *Bombyx mori* sbRNA, generated by MFold Server and drawn by Varna.<sup>33</sup> See that UUAUC segment (19 to 23) is unstructured as a single hairpin loop as also observed in vertebrates Y RNAs. Conserved motif for Y RNAs in red and blue, variable region in yellow, conserved sequence for sbRNAs in orange.
